# Supplementary material
Source: MDPI journal article supplement (https://www.mdpi.com/2227-9717/10/3/502)
Supplement: s1 [file s1]

**Figure S1.** Correlation between 3-MH concentrations at the end of fermentation and H<sub>2</sub>S released during fermentation of Pinot Noir must by 11 wine strains with different *IRC7* genotypes. The correlation coefficient (r) was 0.66 (P= 0.029).

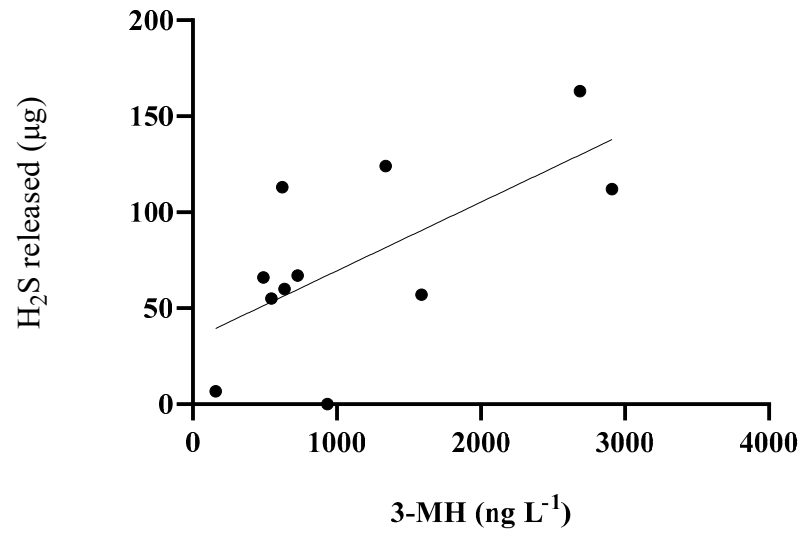

**Figure S2.** Regression coefficients from a partial least squares model generated to relate volatile composition for the the Grenache wines made with different yeast strains with aroma (A) attributes: a ) 3-factor model for *red fruit* aroma; b) *red fruit* aroma – excluding AWRI1776; c) *cherry/confectionary* aroma - excluding AWRI1776. Abbreviations of volatiles can be found in Table S8.

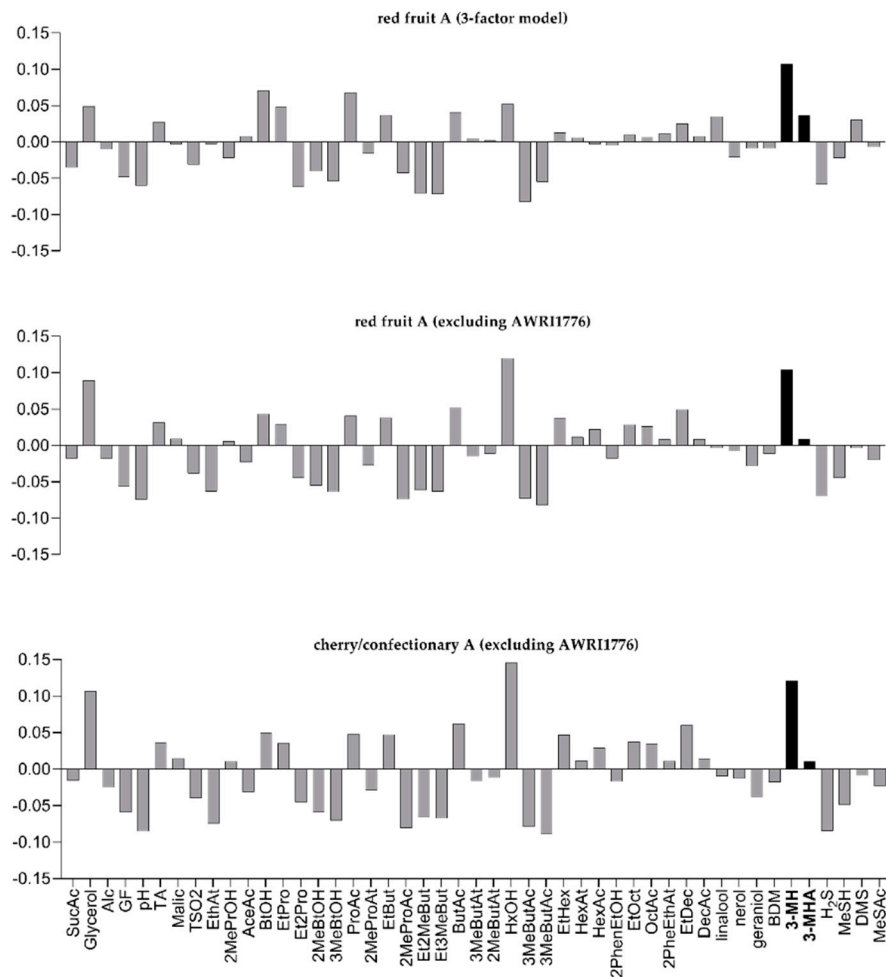

**Table S1: Free thiols validation**

Validation data for free thiol (3-MH, 3-MHA, and 4-MMP) analysis. LOD and LOQ are defined as signal-to-noise equal to three and ten, respectively.

Calibration function, spike recovery, and repeatability were all determined in a commercially available Shiraz wine.

| Compound | MRM transitions<br>Quantifier<br>(qualifier) | Retention<br>time (CV) | Internal<br>standard   | MRM transitions<br>Quantifier<br>(qualifier) | Retention<br>time (CV) | Injection<br>size (μL) | Calibration<br>range<br>(ng/L) | R <sup>2</sup> | LOD  | LOQ  | Spike<br>recovery<br>(measured<br>amount<br>ng/L) | Repeatability<br>CV (n = 7) |
|----------|----------------------------------------------|------------------------|------------------------|----------------------------------------------|------------------------|------------------------|--------------------------------|----------------|------|------|---------------------------------------------------|-----------------------------|
| 3-MH     | 244.2 → 144.0<br>(244.2 → 111.0)             | 1.73<br>(0.28%)        | d <sub>10</sub> -3-MH  | 254.3 → 144.9<br>(254.3 → 111.1)             | 1.68<br>(0.29%)        | 5                      | 0, 15 – 6170                   | 0.9988         | 1.57 | 5.25 | 89% (5501)                                        | 3.15%                       |
| 3-MHA    | 286.2 → 143.8<br>(286.2 → 110.9)             | 3.57<br>(0.11%)        | d <sub>5</sub> -3-MHA  | 291.3 → 144.1<br>(291.3 → 85.2)              | 3.55<br>(0.15%)        | 10                     | 0, 1 – 1090                    | 0.9999         | 0.15 | 0.51 | 101% (443)                                        | 4.54%                       |
| 4-MMP    | 242.2 → 144.2<br>(242.2 → 111.3)             | 1.51<br>(0.35%)        | d <sub>10</sub> -4-MMP | 252.5 → 145.1<br>(252.5 → 111.1)             | 1.47<br>(0.36%)        | 10                     | 0, 2 - 430                     | 0.9994         | 0.37 | 1.23 | 97% (167)                                         | 6.80%                       |

**Table S2: Bound thiols validation**

| Compound                                                 | MRM transitions<br>Quantifier<br>(qualifier)                         | Retention<br>time (CV) | Internal<br>standard                                                     | MRM transitions<br>Quantifier<br>(qualifier)       | Retention<br>time (CV) | Injection<br>size (µL) | Calibration<br>range (µg/L) | R <sup>2</sup> | LOD  | LOQ  | Spike recovery<br>(measured<br>amount µg/L) | Repeatability<br>CV (n = 7) |
|----------------------------------------------------------|----------------------------------------------------------------------|------------------------|--------------------------------------------------------------------------|----------------------------------------------------|------------------------|------------------------|-----------------------------|----------------|------|------|---------------------------------------------|-----------------------------|
| 3-S-cysteinylhexan-1-ol ( <i>S</i> )-diastereomer        | 222.1 → 205.1<br>(222.1 → 101.1,<br>222.1 → 83.0)                    | 1.55<br>(0.97%)        | d <sub>8</sub> -3-S-cysteinylhexan-1-ol ( <i>S</i> )-diastereomer        | 230.2 → 213.1<br>(230.2 → 109.3,<br>230.2 → 90.2)  | 1.49<br>(0.87%)        | 2                      | 0, 5 - 450                  | 0.9970         | 0.78 | 2.60 | 95.2% (300)                                 | 6.82%                       |
| 3-R-cysteinylhexan-1-ol ( <i>R</i> )-diastereomer        | 222.1 → 205.1<br>(222.1 → 101.1,<br>222.1 → 83.0)                    | 1.65<br>(0.85%)        | d <sub>8</sub> -3-R-cysteinylhexan-1-ol ( <i>R</i> )-diastereomer        | 230.2 → 213.1<br>(230.2 → 109.3,<br>230.2 → 90.2)  | 1.59<br>(0.78%)        | 2                      | 0, 5 - 511                  | 0.9959         | 0.70 | 2.35 | 96.1% (255)                                 | 6.35%                       |
| 3-S-glutathionylhexan-1-ol ( <i>S</i> )-diastereomer     | 408.6 → 333.3<br>(408.6 → 279.4,<br>408.6 → 262.2,<br>408.6 → 162.1) | 3.24<br>(1.02%)        | d <sub>9</sub> -3-S-glutathionylhexan-1-ol ( <i>S</i> )-diastereomer     | 417.6 → 288.4<br>(417.6 → 271.3,<br>417.6 → 162.2) | 3.08<br>(1.01%)        | 2                      | 0, 11 - 648                 | 0.9962         | 1.84 | 6.13 | 89.1% (432)                                 | 6.67%                       |
| 3-R-glutathionylhexan-1-ol ( <i>R</i> )-diastereomer     | 408.6 → 333.3<br>(408.6 → 279.4,<br>408.6 → 262.2,<br>408.6 → 162.1) | 3.56<br>(0.96%)        | d <sub>9</sub> -3-R-glutathionylhexan-1-ol ( <i>R</i> )-diastereomer     | 417.6 → 288.4<br>(417.6 → 271.3,<br>417.6 → 162.2) | 3.37<br>(0.98%)        | 2                      | 0, 11 - 864                 | 0.9994         | 2.70 | 8.99 | 99.2% (432)                                 | 5.40%                       |
| 4-glutathionyl-4-methylpentan-2-one                      | 406.0 → 256.1<br>(406.0 → 179.1,<br>406.0 → 162.1)                   | 1.52<br>(1.75%)        | d <sub>10</sub> -4-glutathionyl-4-methylpentan-2-one                     | 413.3 → 266.3<br>(413.3 → 284.3,<br>413.3 → 179.2) | 1.48<br>(0.94%)        | 2                      | 0, 5 - 819                  | 0.9957         | 0.26 | 0.87 | 94.8% (546)                                 | 6.26%                       |
| 4-cysteinyl-4-methylpentan-2-one                         | 220.2 → 122.1<br>(220.2 → 99.2)                                      | 0.80<br>(1.12%)        | d <sub>10</sub> -4-cysteinyl-4-methylpentan-2-one                        | 226.1 → 122.2<br>(226.1 → 105.2)                   | 0.78<br>(1.24%)        | 2                      | 0, 4 - 519                  | 0.9956         | 0.17 | 0.57 | 88.8% (519)                                 | 6.91%                       |
| 3-S-cysteinylglycinehexan-1-ol ( <i>S</i> )-diastereomer | 279.4 → 262.2<br>(279.4 → 162.1)                                     | 2.11<br>(1.01%)        | d <sub>8</sub> -3-S-cysteinylglycinehexan-1-ol ( <i>S</i> )-diastereomer | 230.2 → 213.1<br>(230.2 → 109.3,<br>230.2 → 90.2)  | 1.49<br>(0.87%)        | 2                      | 0, 4 - 309                  | 0.9996         | 1.09 | 3.62 | 91.3% (309)                                 | 7.68%                       |
| 3-R-cysteinylglycinehexan-1-ol ( <i>R</i> )-diastereomer | 279.4 → 262.2<br>(279.4 → 62.1)                                      | 2.37<br>(1.02%)        | d <sub>8</sub> -3-R-cysteinylglycinehexan-1-ol ( <i>R</i> )-diastereomer | 230.2 → 213.1<br>(230.2 → 109.3,<br>230.2 → 90.2)  | 1.59<br>(0.78%)        | 2                      | 0, 4 - 309                  | 0.9995         | 0.64 | 2.15 | 88.3% (309)                                 | 6.90%                       |

**Table S3.** Sensory attributes, definitions and composition of reference standards for the sensory study on the Grenache wines.

| Attribute                 | Definition/Synonyms                                                                                  | Standard                                                                                                                                                                                                                 |
|---------------------------|------------------------------------------------------------------------------------------------------|--------------------------------------------------------------------------------------------------------------------------------------------------------------------------------------------------------------------------|
| <b>Appearance</b>         |                                                                                                      |                                                                                                                                                                                                                          |
| Red colour                | The degree of red colour in the sample                                                               |                                                                                                                                                                                                                          |
| Brown tinge               | The degree of brown hue in the sample                                                                |                                                                                                                                                                                                                          |
| <b>Aroma</b>              |                                                                                                      |                                                                                                                                                                                                                          |
| Overall fruit             | Intensity of the overall fruity aromas in the sample                                                 |                                                                                                                                                                                                                          |
| Red fruit                 | Intensity of the aroma of red fruits and berries: raspberries, cranberries and strawberries          | 2 x frozen raspberries (Sara Lee) and 1 frozen strawberry (Welch's)                                                                                                                                                      |
| Dark fruit                | Intensity of the aroma of dark fruits and berries: blackberries, plums, blueberries and blackcurrant | 2 x frozen blueberries, 1 x frozen blackberry (Sara Lee), 1 mL blackcurrant syrup (Ribena), and 3 g of plum paste (Maggie Beers)                                                                                         |
| Cherry/<br>Confectionary  | Intensity of the aroma of cherry flavoured confectionary and banana                                  | Standard 1. 5 g Cherry Lips (Fundy Gum) not in wine. Standard 2. 20 µL ester mix: 2400 mg/L isoamyl acetate, 120 mg/L ethyl butyrate, 320 mg/L ethyl-hexanoate, 540 mg/L, ethyl octanoate, 140 mg/L phenyl-ethyl-acetate |
| Floral                    | Intensity of the aroma of flowers rose and orange blossom                                            | 20 µL of 10 mL/L linalool and 20 µL of methyl anthranilate of 0.184 g/L                                                                                                                                                  |
| Stewed<br>apple/Port-like | Intensity of the aroma of stewed, bruised apples and Port-like stewed fruit                          | 100 µL of 1 g/L β-damascenone                                                                                                                                                                                            |
| Tinned Vegetable          | Intensity of the aroma of tinned and cooked vegetables                                               | 1 µL of 0.1% v/v dimethyl disulfide                                                                                                                                                                                      |
| Earthy                    | Intensity of aroma earthiness and mushrooms                                                          | Standard 1. 50 µL of 4 mg/L Geosmin.<br>Standard 2. 10 g fresh button mushroom (Foodland) not in wine                                                                                                                    |
| Stalky                    | Intensity of the aroma of green stalks, capsicum, rhubarb stalks, fresh leaf, stalk and spinach      | 3 µL of 53.82 mg/L of 3-isobutyl-2-methoxypyrazine                                                                                                                                                                       |
| Flint                     | Intensity of flint and struck match                                                                  | 3 µL of 1 mg/L benzyl mercaptan                                                                                                                                                                                          |

| Attribute                   | Definition/Synonyms                                                                                                                                 | Standard                                                            |
|-----------------------------|-----------------------------------------------------------------------------------------------------------------------------------------------------|---------------------------------------------------------------------|
| Drain                       | Intensity of the aroma of dirty drain, natural gas and boiled eggs                                                                                  | 20 µL of 2 % mercaptoethanol v/v and 0.01 g wood ash                |
| Pungent                     | Intensity of the aroma and effect of alcohol.                                                                                                       | 4 mL of 95% food grade ethanol (Tarac Technologies)                 |
| Nail Polish Remover/Vinegar | Intensity of the aroma of nail polish remover and vinegar                                                                                           | 20 µL of 1000 g/L acetic acid and 5 µL of 1000 g/L                  |
| <b>Palate</b>               |                                                                                                                                                     |                                                                     |
| Overall flavour intensity   | Intensity of overall flavours in the sample.                                                                                                        |                                                                     |
| Dark fruit                  | Intensity of the flavour of various dark fruits: blackberries, plums, blueberries and blackcurrants                                                 |                                                                     |
| Red fruit                   | Intensity of the flavour of red fruits and berries: raspberries, cranberries and strawberries                                                       |                                                                     |
| Cherry/Confectionary        | Intensity of the flavour of cherry flavoured confectionary and banana                                                                               |                                                                     |
| Stewed apple/Port-like      | Intensity of the aroma of stewed, bruised apples and Port-like stewed fruit                                                                         |                                                                     |
| Viscosity                   | The perception of the body, weight or thickness of the wine in the mouth. Low = watery, thin mouth feel. High = oily, thick mouth feel.             | 1.5 g/L carboxymethylcellulose sodium salt (Sigma Aldrich) in water |
| Acidity                     | Intensity of acid taste in the mouth including aftertaste.                                                                                          | 2 g/L L-(+)-tartaric acid (Chem-Supply) in water                    |
| Astringency                 | The drying and mouth-puckering sensation in the mouth. Low = coating teeth; Medium = mouth coating & drying; High = puckering, lasting astringency. | 0.43 g/L alum sulfate (Ajax fine Chem Supply PTY LTD in water       |
| Bitterness                  | The intensity of bitter taste perceived in the mouth, or after expectoration.                                                                       | 0.15 g/L Quinine sulfate (Sigma Aldrich) in water                   |

| Attribute                   | Definition/Synonyms                                                                                                                                 | Standard                                            |
|-----------------------------|-----------------------------------------------------------------------------------------------------------------------------------------------------|-----------------------------------------------------|
| Hotness                     | The intensity of alcohol hotness perceived in the mouth, after expectoration and the associated burning sensation. Low = warm; High = hot, burning. | 8% food grade alcohol (Tarac Technologies) in water |
| Nail Polish Remover/Vinegar | Intensity of nail polish remover and vinegar flavour; including aftertaste.                                                                         |                                                     |
| Fruit AT                    | The lingering fruit flavour perceived in the mouth after expectorating.                                                                             |                                                     |

All red wine standards were added to 30 mL of 2017 Yalumba premium selection bag-in-box Shiraz unless otherwise noted.

**Table S4.** Mean sensory attribute scores for the yeast strains and Tukey's honestly significant different test values. A: aroma, F: Flavour, AT: After Taste

| Attribute                      | AWRI<br>778 | AWRI<br>1776 | AWRI<br>1833 | AWRI<br>2260 | AWRI<br>2878 | AWRI<br>2914 | HSD  |
|--------------------------------|-------------|--------------|--------------|--------------|--------------|--------------|------|
| Red colour intensity           | 5.21        | 4.42         | 5.15         | 5.03         | 5.03         | 5.27         | 0.46 |
| Brown tinge                    | 1.06        | 3.22         | 1.32         | 1.81         | 1.63         | 0.97         | 0.60 |
| Overall fruit A                | 5.61        | 5.35         | 5.82         | 5.48         | 5.64         | 5.77         | 0.60 |
| Red fruit A                    | 5.11        | 4.69         | 5.35         | 4.74         | 5.07         | 5.43         | 0.65 |
| Dark fruit A                   | 3.12        | 3.19         | 3.10         | 3.28         | 3.28         | 3.09         | ns   |
| Cherry/Confectionary A         | 3.24        | 2.83         | 3.67         | 3.16         | 3.27         | 3.63         | 0.65 |
| Floral A                       | 3.56        | 2.79         | 3.69         | 3.07         | 3.45         | 3.60         | 1.14 |
| Stewed apple/Port-like A       | 2.42        | 2.75         | 2.21         | 2.40         | 2.25         | 2.21         | 0.72 |
| Tinned vegetable A             | 1.79        | 2.45         | 1.58         | 2.20         | 1.72         | 1.63         | 0.63 |
| Earthy A                       | 2.07        | 2.48         | 1.83         | 2.09         | 2.04         | 2.14         | 0.59 |
| Stalky A                       | 1.88        | 2.12         | 2.05         | 2.19         | 1.96         | 2.12         | ns   |
| Flint A                        | 1.57        | 1.92         | 1.52         | 1.61         | 1.48         | 1.58         | ns   |
| Drain A                        | 1.30        | 1.76         | 1.12         | 1.56         | 1.09         | 1.06         | 0.40 |
| Pungent A                      | 4.46        | 4.53         | 4.32         | 4.70         | 4.58         | 4.64         | ns   |
| Nail Polish Remover/Vinegar A  | 2.77        | 2.30         | 2.04         | 2.41         | 2.25         | 2.16         | ns   |
| Overall fruit F                | 5.51        | 5.44         | 5.68         | 5.54         | 5.43         | 5.64         | ns   |
| Dark fruit F                   | 3.29        | 3.57         | 3.42         | 3.61         | 3.38         | 3.37         | ns   |
| Red fruit F                    | 5.04        | 4.62         | 5.19         | 4.86         | 4.83         | 5.14         | 0.39 |
| Cherry/Confectionary F         | 3.27        | 3.25         | 3.75         | 3.36         | 3.26         | 3.46         | ns   |
| Stewed apple/Port-like F       | 2.87        | 3.16         | 2.45         | 2.71         | 2.44         | 2.35         | 0.34 |
| Viscosity                      | 3.14        | 3.14         | 3.20         | 3.05         | 3.17         | 3.03         | ns   |
| Acidity                        | 4.29        | 4.15         | 4.32         | 4.52         | 4.42         | 4.51         | ns   |
| Astringency                    | 3.64        | 3.50         | 3.62         | 3.82         | 3.47         | 3.74         | ns   |
| Hotness                        | 4.34        | 4.55         | 4.39         | 4.68         | 4.19         | 4.26         | ns   |
| Bitterness                     | 3.52        | 3.70         | 3.43         | 3.66         | 3.42         | 3.41         | ns   |
| Fruity AT                      | 4.14        | 3.84         | 3.96         | 4.16         | 3.98         | 4.23         | ns   |
| Nail Polish Remover/Vinegar AT | 2.61        | 2.16         | 2.13         | 2.08         | 2.11         | 1.85         | ns   |



**Table S5.** Cysteine-*S*-conjugate  $\beta$ -lyase activity towards STC in cell-free protein extracts from 39 yeast strains with different *IRC7* genotypes

| AWRI number | Strain description/origin <sup>a</sup> | $\beta$ -lyase activity<br>(nmol min <sup>-1</sup> mg protein <sup>-1</sup> ) | <i>IRC7</i> genotype <sup>b</sup>                        |
|-------------|----------------------------------------|-------------------------------------------------------------------------------|----------------------------------------------------------|
| 213         | Wine isolate, Australia                | 2.44                                                                          | <i>IRC7<sup>S</sup> / IRC7<sup>S</sup></i>               |
| 350         | <b>AWRI350 (Maurivin)</b>              | 2.29                                                                          | <i>IRC7<sup>S</sup> / IRC7<sup>S</sup></i>               |
| 735         | Cider and wine yeast, Switzerland      | 2.16                                                                          | <i>IRC7<sup>S</sup> / IRC7<sup>S</sup></i>               |
| 793         | Wine isolate, New Zealand              | 1.80                                                                          | <i>IRC7<sup>S</sup> / IRC7<sup>S</sup></i>               |
| 796         | <b>AWRI796 (Maurivin)</b>              | 1.80                                                                          | <i>IRC7<sup>S</sup> / IRC7<sup>S</sup></i>               |
| 833         | Wine isolate, Australia                | 1.60                                                                          | <i>IRC7<sup>S</sup> / IRC7<sup>S</sup></i>               |
| 1483        | <b>Lalvin ICV D254 (Lallemand)</b>     | 1.60                                                                          | <i>IRC7<sup>S</sup> / IRC7<sup>S</sup></i>               |
| 1709        | Wine isolate, Germany                  | 1.93                                                                          | <i>IRC7<sup>S</sup> / IRC7<sup>S</sup></i>               |
| 1716        | Wine isolate, Australia                | 2.20                                                                          | <i>IRC7<sup>S</sup> / IRC7<sup>S</sup></i>               |
| 1833        | <b>Uvaferm 43 (Lallemand)</b>          | 2.20                                                                          | <i>IRC7<sup>S</sup> / IRC7<sup>S</sup></i>               |
| 2255        | <b>Uvaferm HPS (Lallemand)</b>         | 2.14                                                                          | <i>IRC7<sup>S</sup> / IRC7<sup>S</sup></i>               |
| 2874        | <b>Fermicru VR5 (Oenobrand)</b>        | 2.04                                                                          | <i>IRC7<sup>S</sup> / IRC7<sup>S</sup></i>               |
| 1490        | <b>Lalvin Rhone 2323 (Lallemand)</b>   | 2.49                                                                          | <i>IRC7<sup>S</sup> / IRC7<sup>S</sup> Y56stop</i>       |
| 1742        | Wine isolate, Australia                | 1.83                                                                          | <i>IRC7<sup>S</sup> / IRC7<sup>S</sup> Y56stop</i>       |
| 2865        | <b>Collection Cepage Pinot (DSM)</b>   | 1.47                                                                          | <i>IRC7<sup>S</sup> G304D / IRC7<sup>S</sup> Y56stop</i> |
| 1017        | <b>AWRI R2 (Maurivin)</b>              | 7.22                                                                          | <i>IRC7<sup>S</sup> / IRC7<sup>L</sup></i>               |
| 1537        | <b>VIN13 (Anchor Yeast)</b>            | 6.30                                                                          | <i>IRC7<sup>S</sup> / IRC7<sup>L</sup></i>               |
| 2878        | <b>NT112 (Anchor Yeast)</b>            | 8.20                                                                          | <i>IRC7<sup>S</sup> / IRC7<sup>L</sup></i>               |
| 1482        | Wine isolate, Australia                | 5.20                                                                          | <i>IRC7<sup>S</sup> Y56stop / IRC7<sup>L</sup></i>       |
| 1487        | <b>Lalvin Rhone 2056 (Lallemand)</b>   | 5.21                                                                          | <i>IRC7<sup>S</sup> Y56stop / IRC7<sup>L</sup></i>       |
| 838         | <b>Lalvin EC1118 (Lallemand)</b>       | 2.39                                                                          | <i>IRC7<sup>S</sup> / IRC7<sup>L</sup> T185A</i>         |

| AWRI number | Strain description/origin <sup>a</sup>   | $\beta$ -lyase activity<br>(nmol min <sup>-1</sup> mg protein <sup>-1</sup> ) | <i>IRC7</i> genotype <sup>b</sup>                                |
|-------------|------------------------------------------|-------------------------------------------------------------------------------|------------------------------------------------------------------|
| 1001        | Wine isolate, Australia                  | 2.80                                                                          | <i>IRC7<sup>S</sup> / IRC7<sup>L</sup> T185A</i>                 |
| 1638        | <b>Platinum (Maurivin)</b>               | 5.21                                                                          | <i>IRC7<sup>S</sup> / IRC7<sup>L</sup> T185A</i>                 |
| 2260        | <b>Lalvin QA23 (Lallemand)</b>           | 2.20                                                                          | <i>IRC7<sup>S</sup> / IRC7<sup>L</sup> T185A</i>                 |
| 2858        | <b>Zymaflore VL1 (Laffort)</b>           | 2.20                                                                          | <i>IRC7<sup>S</sup> / IRC7<sup>L</sup> T185A</i>                 |
| 947         | Wine isolate                             | 3.40                                                                          | <i>IRC7<sup>S</sup> P146A / IRC7<sup>L</sup> T185A P146R</i>     |
| 740         | Wine isolate, Germany                    | 1.80                                                                          | <i>IRC7<sup>S</sup> / IRC7<sup>L</sup> T185A P146R G321D</i>     |
| 1776        | Wine isolate, New Zealand                | 2.60                                                                          | <i>IRC7<sup>S</sup> T185A / IRC7<sup>L</sup> T185A P146R</i>     |
| 934         | UCD 48-41, Fruit isolate, USA            | 10.11                                                                         | <i>IRC7<sup>L</sup> / IRC7<sup>L</sup></i>                       |
| 2914        | <b>Maurivin UOA Maxithiol (Maurivin)</b> | 11.66                                                                         | <i>IRC7<sup>L</sup> / IRC7<sup>L</sup></i>                       |
| 1082        | NCYC 761, Palm wine isolate              | 7.81                                                                          | <i>IRC7<sup>L</sup> E374G / IRC7<sup>L</sup> E374G</i>           |
| 2829        | PW5, Palm wine isolate, Nigeria          | 13.99                                                                         | <i>IRC7<sup>L</sup> E374G / IRC7<sup>L</sup> E374G</i>           |
| 1729        | Wine isolate, Australia                  | 9.40                                                                          | <i>IRC7<sup>L</sup> / IRC7<sup>L</sup> D47N</i>                  |
| 1688        | <b>Zymaflore VL3c (Laffort)</b>          | 6.00                                                                          | <i>IRC7<sup>L</sup> T185A / IRC7<sup>L</sup> T185A</i>           |
| 2913        | <b>Maurivin Sauvignon (Maurivin)</b>     | 5.24                                                                          | <i>IRC7<sup>L</sup> T185A / IRC7<sup>L</sup> T185A</i>           |
| 739         | Apple skin, England                      | 3.19                                                                          | <i>IRC7<sup>L</sup> T185A K43R / IRC7<sup>L</sup> T185A K43R</i> |
| 1493        | <b>Lalvin 71B (Lallemand)</b>            | 4.70                                                                          | <i>IRC7<sup>L</sup> T185A K43R / IRC7<sup>L</sup> T185A K43R</i> |
| 778         | Wine isolate, Australia                  | 3.34                                                                          | <i>IRC7<sup>L</sup> T185A / IRC7<sup>L</sup> T185A G321D</i>     |
| 2861        | <b>Zymaflore X5 (Laffort)</b>            | 7.88                                                                          | <i>IRC7<sup>L</sup> / IRC7<sup>L</sup> T185A P146A</i>           |

<sup>a</sup>Commercial strains are indicated in bold-face type, while yeast manufacturer is shown in brackets.

<sup>b</sup>*IRC7* genotype, as determined in Cordente et al (2019). *IRC7<sup>S</sup>* corresponds to the allele found in the haploid laboratory strain BY4742 (encoding for 340 amino acids); while *IRC7<sup>L</sup>* corresponds to the long allele from the commercial strain Maurivin UOA Maxithiol (AWRI2914), and encoding for 400 amino acids.

**Table S6.** Pearson correlation coefficients (r) between the concentration of free thiols (3-MH and 3-MHA) and their precursors in Pinot Noir wines fermented with 11 strains with different *IRC7* genotypes. Two-tailed Pearson correlation analysis was conducted with  $\alpha = 0.05$ . \*  $P < 0.05$ , \*\*  $P < 0.01$ , \*\*\*  $P < 0.001$ .

<sup>a</sup> $\Sigma$ Precursors represents the sum of all precursors as 3-MH equivalents.

|                     | $\Sigma$ Precursors <sup>a</sup> | GSH-3-MH | Cys-Gly-3-MH | Cys-3-MH | 3-MH     | 3-MHA    |
|---------------------|----------------------------------|----------|--------------|----------|----------|----------|
| $\Sigma$ Precursors | <b>1</b>                         |          |              |          |          |          |
| GSH-3-MH            | 0.99***                          | <b>1</b> |              |          |          |          |
| Cys-Gly-3-MH        | 0.80**                           | 0.81**   | <b>1</b>     |          |          |          |
| Cys-3-MH            | 0.81**                           | 0.77**   | 0.42         | <b>1</b> |          |          |
| 3-MH                | -0.57                            | -0.58    | -0.32        | -0.25    | <b>1</b> |          |
| 3-MHA               | -0.65*                           | -0.67*   | -0.37        | -0.35    | 0.95***  | <b>1</b> |

**Table S7.** Pearson correlation coefficients (r) for the concentrations of free thiols (3-MH and 3-MHA) and volatile sulfur compounds (VSCs) in Pinot Noir wines fermented with 11 strains with different *IRC7* genotypes, and different  $\beta$ -lyase activities. Two-tailed Pearson correlation analysis was conducted with  $\alpha = 0.05$ . \*  $P < 0.05$ , \*\*  $P < 0.01$ , \*\*\*  $P < 0.001$ . <sup>a</sup>H<sub>2</sub>S released during fermentation was measured using silver nitrate selective gas detector tubes.

|                      | H <sub>2</sub> S | H <sub>2</sub> S released <sup>a</sup> | MeSH     | MeSAc    | 3-MH     | 3-MHA    | $\beta$ -lyase |
|----------------------|------------------|----------------------------------------|----------|----------|----------|----------|----------------|
| H <sub>2</sub> S     | <b>1</b>         |                                        |          |          |          |          |                |
| H <sub>2</sub> Stube | 0.12             | <b>1</b>                               |          |          |          |          |                |
| MeSH                 | 0.23             | 0.19                                   | <b>1</b> |          |          |          |                |
| MeSAc                | 0.30             | 0.41                                   | 0.48     | <b>1</b> |          |          |                |
| 3-MH                 | 0.08             | 0.66*                                  | -0.05    | 0.25     | <b>1</b> |          |                |
| 3-MHA                | 0.15             | 0.60*                                  | 0.03     | 0.33     | 0.95***  | <b>1</b> |                |
| $\beta$ -lyase       | -0.19            | 0.50                                   | -0.04    | 0.17     | 0.93***  | 0.93***  | <b>1</b>       |

**Table S8.** Summary of volatile and non-volatile compounds produced by six wine yeast strains in Grenache wine after 9 months in bottle. The results are the average of triplicate ferments  $\pm$  standard deviation.

|                                                                       | <b>Label</b>     | <b>AWRI<br/>778</b>           | <b>AWRI<br/>1776</b>         | <b>AWRI<br/>1833</b>          | <b>AWRI<br/>2260</b>          | <b>AWRI<br/>2878</b>          | <b>AWRI<br/>2914</b>          | <b>P<br/>values</b> | <b>F<br/>values</b> |
|-----------------------------------------------------------------------|------------------|-------------------------------|------------------------------|-------------------------------|-------------------------------|-------------------------------|-------------------------------|---------------------|---------------------|
| <b>Main fermentation products</b>                                     |                  |                               |                              |                               |                               |                               |                               |                     |                     |
| Ethanol (% v/v)                                                       | Alc              | 16.1 $\pm$ 0.1 <sup>a</sup>   | 16.0 $\pm$ 0 <sup>bc</sup>   | 16.1 $\pm$ 0.1 <sup>ab</sup>  | 15.9 $\pm$ 0.1 <sup>bc</sup>  | 15.9 $\pm$ 0 <sup>c</sup>     | 15.9 $\pm$ 0.1 <sup>c</sup>   | 0.001               | 10.2                |
| Acetic acid (g L <sup>-1</sup> )                                      | AceAc            | 0.92 $\pm$ 0.05 <sup>a</sup>  | 0.22 $\pm$ 0.01 <sup>d</sup> | 0.45 $\pm$ 0.02 <sup>b</sup>  | 0.23 $\pm$ 0.02 <sup>d</sup>  | 0.37 $\pm$ 0.02 <sup>c</sup>  | 0.26 $\pm$ 0.02 <sup>d</sup>  | <0.001              | 452                 |
| Succinic acid (g L <sup>-1</sup> )                                    | SucAc            | 0.94 $\pm$ 0.03 <sup>d</sup>  | 1.46 $\pm$ 0.02 <sup>a</sup> | 1.04 $\pm$ 0.04 <sup>cd</sup> | 1.23 $\pm$ 0.01 <sup>b</sup>  | 1.29 $\pm$ 0.08 <sup>b</sup>  | 1.17 $\pm$ 0.06 <sup>bc</sup> | < 0.001             | 42.2                |
| Glycerol (g L <sup>-1</sup> )                                         | Glycerol         | 7.1 $\pm$ 0.2 <sup>c</sup>    | 8.3 $\pm$ 0.2 <sup>a</sup>   | 7.8 $\pm$ 0.2 <sup>ab</sup>   | 7.5 $\pm$ 0.1 <sup>bc</sup>   | 8.2 $\pm$ 0.2 <sup>a</sup>    | 8.0 $\pm$ 0.2 <sup>a</sup>    | < 0.001             | 20.4                |
| Malic acid (g L <sup>-1</sup> )                                       | Malic            | nd                            | nd                           | nd                            | 0.13 $\pm$ 0.03 <sup>b</sup>  | 1.21 $\pm$ 0.25 <sup>a</sup>  | nd                            | < 0.001             | 18.1                |
| pH                                                                    | pH               | 3.56 $\pm$ 0.06               | 3.74 $\pm$ 0.0               | 3.51 $\pm$ 0.01               | 3.52 $\pm$ 0.04               | 3.55 $\pm$ 0.04               | 3.41 $\pm$ 0.01               | <0.001              | 38.3                |
| Titratable Acidity pH 8.2                                             | TA               | 5.3 $\pm$ 0.1 <sup>ab</sup>   | 4.7 $\pm$ 0 <sup>c</sup>     | 5.1 $\pm$ 0 <sup>b</sup>      | 5.0 $\pm$ 0.1 <sup>b</sup>    | 5.4 $\pm$ 0.2 <sup>a</sup>    | 5.0 $\pm$ 0.1 <sup>b</sup>    | < 0.001             | 18.8                |
| Residual sugar                                                        | GF               | 0.2 $\pm$ 0 <sup>d</sup>      | 0.5 $\pm$ 0.1 <sup>a</sup>   | 0.2 $\pm$ 0 <sup>d</sup>      | 0.4 $\pm$ 0.1 <sup>bc</sup>   | 0.4 $\pm$ 0 <sup>b</sup>      | 0.3 $\pm$ 0 <sup>c</sup>      | <0.001              | 52.1                |
| Free SO <sub>2</sub> (mg L <sup>-1</sup> )                            | FSO <sub>2</sub> | 46 $\pm$ 1                    | 45 $\pm$ 2                   | 44 $\pm$ 1                    | 46 $\pm$ 2                    | 45 $\pm$ 3                    | 46 $\pm$ 1                    | 0.744               | 0.54                |
| Total SO <sub>2</sub> (mg L <sup>-1</sup> )                           | TSO <sub>2</sub> | 85 $\pm$ 3 <sup>c</sup>       | 82 $\pm$ 3 <sup>c</sup>      | 90 $\pm$ 1 <sup>c</sup>       | 118 $\pm$ 6 <sup>b</sup>      | 146 $\pm$ 8 <sup>a</sup>      | 105 $\pm$ 4 <sup>b</sup>      | < 0.001             | 70.0                |
| *Total SO <sub>2</sub> , end ferment (mg L <sup>-1</sup> )            |                  | <3                            | <3                           | <3                            | 33 $\pm$ 12 <sup>b</sup>      | 71 $\pm$ 5 <sup>a</sup>       | 15 $\pm$ 4 <sup>c</sup>       | 0.001               | 29.6                |
| <b>Yeast fermentation products (<math>\mu</math>g L<sup>-1</sup>)</b> |                  |                               |                              |                               |                               |                               |                               |                     |                     |
| Ethyl acetate (mg L <sup>-1</sup> )                                   | EthAt            | 60.6 $\pm$ 2.2 <sup>a</sup>   | 43.0 $\pm$ 2.8 <sup>c</sup>  | 32.0 $\pm$ 0.2 <sup>d</sup>   | 41.4 $\pm$ 2.0 <sup>c</sup>   | 53.5 $\pm$ 1.7 <sup>b</sup>   | 53.5 $\pm$ 2.6 <sup>b</sup>   | < 0.001             | 73.2                |
| 2-methyl propanol (mg L <sup>-1</sup> )                               | 2MePrOH          | 14.0 $\pm$ 1.5 <sup>d</sup>   | 95.4 $\pm$ 3.9 <sup>a</sup>  | 25.0 $\pm$ 1.2 <sup>bc</sup>  | 29.4 $\pm$ 0.4 <sup>b</sup>   | 22.5 $\pm$ 0.3 <sup>c</sup>   | 24.5 $\pm$ 0.5 <sup>bc</sup>  | < 0.001             | 820                 |
| Butanol (mg L <sup>-1</sup> )                                         | BtOH             | 1.78 $\pm$ 0.04 <sup>bc</sup> | 4.35 $\pm$ 0.35 <sup>b</sup> | 1.09 $\pm$ 0.07 <sup>c</sup>  | 1.95 $\pm$ 0.19 <sup>bc</sup> | 1.85 $\pm$ 0.10 <sup>bc</sup> | 22.7 $\pm$ 2.3 <sup>a</sup>   | < 0.001             | 233                 |
| Ethyl propanoate                                                      | EtPro            | 29 $\pm$ 0.2 <sup>d</sup>     | 64 $\pm$ 3.9 <sup>b</sup>    | 27 $\pm$ 0.6 <sup>d</sup>     | 46 $\pm$ 1.2 <sup>c</sup>     | 64 $\pm$ 2.6 <sup>b</sup>     | 106 $\pm$ 4.1 <sup>a</sup>    | < 0.001             | 380                 |
| Ethyl 2-methylpropanoate                                              | Et2MePro         | 12 $\pm$ 1.1 <sup>c</sup>     | 24 $\pm$ 0.7 <sup>a</sup>    | 15 $\pm$ 1.6 <sup>bc</sup>    | 23 $\pm$ 3.0 <sup>a</sup>     | 22 $\pm$ 1.5 <sup>a</sup>     | 16 $\pm$ 0.6 <sup>b</sup>     | < 0.001             | 28.2                |
| 2-methylbutanol (mg L <sup>-1</sup> )                                 | 2MeBtOH          | 25.7 $\pm$ 1.3 <sup>c</sup>   | 78.4 $\pm$ 3.5 <sup>a</sup>  | 30.4 $\pm$ 0.8 <sup>c</sup>   | 48.5 $\pm$ 1.2 <sup>b</sup>   | 36.0 $\pm$ 1.2 <sup>d</sup>   | 42.6 $\pm$ 1.8 <sup>c</sup>   | < 0.001             | 313                 |
| 3-methylbutanol (mg L <sup>-1</sup> )                                 | 3MeBtOH          | 152.2 $\pm$ 2.6 <sup>c</sup>  | 252.9 $\pm$ 7.7 <sup>a</sup> | 165.3 $\pm$ 2.4 <sup>d</sup>  | 230.6 $\pm$ 3.9 <sup>b</sup>  | 169.6 $\pm$ 2.7 <sup>d</sup>  | 204.4 $\pm$ 7.7 <sup>c</sup>  | <0.001              | 188                 |

|                                       |           |                          |                          |                          |                          |                         |                          |         |      |
|---------------------------------------|-----------|--------------------------|--------------------------|--------------------------|--------------------------|-------------------------|--------------------------|---------|------|
| Propanoic acid                        | ProAc     | 1306 ± 90 <sup>de</sup>  | 1698 ± 43 <sup>c</sup>   | 1078 ± 40 <sup>c</sup>   | 1540 ± 195 <sup>cd</sup> | 2119 ± 155 <sup>b</sup> | 3725 ± 111 <sup>a</sup>  | < 0.001 | 192  |
| 2-methylpropyl acetate                | 2MeProAt  | 2.9 ± 0.5 <sup>c</sup>   | 84 ± 2.0 <sup>a</sup>    | 0.5 ± 0.7 <sup>c</sup>   | 25 ± 5.3 <sup>c</sup>    | 15 ± 1.5 <sup>d</sup>   | 37 ± 1.2 <sup>b</sup>    | < 0.001 | 472  |
| Ethyl butanoate                       | EtBut     | 174 ± 13 <sup>d</sup>    | 269 ± 11 <sup>bc</sup>   | 252 ± 12 <sup>c</sup>    | 288 ± 1.6 <sup>b</sup>   | 270 ± 10 <sup>bc</sup>  | 352 ± 20 <sup>a</sup>    | < 0.001 | 61.0 |
| 2-methyl propanoic acid               | 2MeProAc  | 384 ± 35 <sup>b</sup>    | 925 ± 140 <sup>a</sup>   | 409 ± 14 <sup>b</sup>    | 544 ± 19 <sup>b</sup>    | 470 ± 26 <sup>b</sup>   | 458 ± 18 <sup>b</sup>    | < 0.001 | 32.3 |
| Ethyl 2-methylbutanoate               | Et2MeBut  | 2.9 ± 0.1 <sup>c</sup>   | 6.0 ± 0.3 <sup>ab</sup>  | 3.5 ± 0.1 <sup>c</sup>   | 6.9 ± 0.8 <sup>a</sup>   | 6.4 ± 0.3 <sup>a</sup>  | 4.9 ± 0.4 <sup>b</sup>   | < 0.001 | 45.8 |
| Ethyl-3-methylbutanoate               | Et3MeBut  | 6.6 ± 0.2 <sup>d</sup>   | 11.4 ± 0.7 <sup>b</sup>  | 8.6 ± 0.1 <sup>cd</sup>  | 15.3 ± 1.4 <sup>a</sup>  | 12.0 ± 0.7 <sup>b</sup> | 10.6 ± 0.5 <sup>bc</sup> | < 0.001 | 46.8 |
| Butanoic acid                         | ButAc     | 1029 ± 22 <sup>d</sup>   | 2033 ± 112 <sup>b</sup>  | 1647 ± 69 <sup>c</sup>   | 1773 ± 48 <sup>bc</sup>  | 1681 ± 75 <sup>c</sup>  | 2438 ± 213 <sup>a</sup>  | < 0.001 | 55.0 |
| 2-methylbutyl acetate                 | 3MeButAt  | 25 ± 1.6 <sup>d</sup>    | 112 ± 7.1 <sup>a</sup>   | 13 ± 2.2 <sup>c</sup>    | 49 ± 7.6 <sup>c</sup>    | 35 ± 2.0 <sup>d</sup>   | 85 ± 1.3 <sup>b</sup>    | < 0.001 | 214  |
| 3-methylbutyl acetate                 | 2MeButAt  | 385 ± 51 <sup>c</sup>    | 1,492 ± 154 <sup>a</sup> | 140 ± 27 <sup>d</sup>    | 805 ± 132 <sup>b</sup>   | 656 ± 54 <sup>b</sup>   | 1,372 ± 6.0 <sup>a</sup> | < 0.001 | 109  |
| Hexanol                               | HxOH      | 4167 ± 204 <sup>bc</sup> | 4873 ± 393 <sup>a</sup>  | 4725 ± 294 <sup>b</sup>  | 3529 ± 93 <sup>c</sup>   | 3971 ± 198 <sup>c</sup> | 3996 ± 132 <sup>c</sup>  | < 0.001 | 13.2 |
| 3-methyl butanoic acid                | 3MeButAc  | 354 ± 18.8 <sup>c</sup>  | 600 ± 35.5 <sup>a</sup>  | 421 ± 13.7 <sup>bc</sup> | 598 ± 77 <sup>a</sup>    | 470 ± 18.3 <sup>b</sup> | 430 ± 40 <sup>bc</sup>   | < 0.001 | 18.7 |
| 2-methyl butanoic acid                | 2MeButAc  | 162 ± 9.7 <sup>d</sup>   | 439 ± 29 <sup>a</sup>    | 169 ± 0.9 <sup>d</sup>   | 270 ± 34 <sup>b</sup>    | 251 ± 19 <sup>bc</sup>  | 197 ± 11 <sup>cd</sup>   | < 0.001 | 73.7 |
| Ethyl hexanoate                       | EtHex     | 187 ± 9.7 <sup>c</sup>   | 233 ± 5.2 <sup>d</sup>   | 372 ± 12.7 <sup>b</sup>  | 402 ± 9.4 <sup>a</sup>   | 304 ± 13.1 <sup>c</sup> | 365 ± 13.3 <sup>b</sup>  | < 0.001 | 182  |
| Hexyl acetate                         | HexAt     | 9.4 ± 1.1 <sup>c</sup>   | 36 ± 5.1 <sup>a</sup>    | 3.1 ± 0.4 <sup>c</sup>   | 6.2 ± 1.8 <sup>c</sup>   | 8.3 ± 0.8 <sup>c</sup>  | 17.1 ± 1.0 <sup>b</sup>  | < 0.001 | 81.6 |
| Hexanoic acid                         | HexAc     | 2457 ± 170 <sup>c</sup>  | 3433 ± 139 <sup>d</sup>  | 5506 ± 198 <sup>b</sup>  | 6271 ± 406 <sup>a</sup>  | 4335 ± 50 <sup>c</sup>  | 5161 ± 121 <sup>b</sup>  | < 0.001 | 133  |
| 2-phenylethanol (mg L <sup>-1</sup> ) | 2PhenEtO  | 17.5 ± 1.0 <sup>d</sup>  | 34.5 ± 1.4 <sup>b</sup>  | 19.7 ± 0.8 <sup>d</sup>  | 35.5 ± 1.6 <sup>b</sup>  | 26.0 ± 1.2 <sup>c</sup> | 42.4 ± 2.7 <sup>a</sup>  | < 0.001 | 115  |
| Ethyl octanoate                       | EtOct     | 240 ± 16 <sup>d</sup>    | 281 ± 14 <sup>d</sup>    | 450 ± 6.0 <sup>b</sup>   | 503 ± 17 <sup>a</sup>    | 383 ± 17 <sup>c</sup>   | 461 ± 19 <sup>b</sup>    | < 0.001 | 144  |
| Octanoic acid                         | OctAc     | 2002 ± 204 <sup>c</sup>  | 2447 ± 93 <sup>d</sup>   | 4094 ± 217 <sup>b</sup>  | 4685 ± 69 <sup>a</sup>   | 3402 ± 146 <sup>c</sup> | 4158 ± 146 <sup>b</sup>  | < 0.001 | 138  |
| 2-phenylethyl acetate                 | 2PheEthAt | 12 ± 0.7 <sup>d</sup>    | 65 ± 4.4 <sup>a</sup>    | 7.0 ± 1.0 <sup>d</sup>   | 23 ± 2.0 <sup>c</sup>    | 25 ± 2.4 <sup>c</sup>   | 49 ± 1.2 <sup>b</sup>    | < 0.001 | 292  |
| Ethyl decanoate                       | EtDec     | 12 ± 1.4 <sup>c</sup>    | 7.1 ± 1.2 <sup>c</sup>   | 24 ± 1.8 <sup>a</sup>    | 25 ± 1.1 <sup>a</sup>    | 18 ± 3.1 <sup>b</sup>   | 23 ± 2.2 <sup>a</sup>    | < 0.001 | 42.7 |
| Decanoic acid                         | DecAc     | 445 ± 32 <sup>d</sup>    | 354 ± 11 <sup>c</sup>    | 708 ± 8 <sup>c</sup>     | 916 ± 9 <sup>a</sup>     | 663 ± 52 <sup>c</sup>   | 833 ± 17 <sup>b</sup>    | < 0.001 | 202  |

|                                                                        | Label            | AWRI<br>778        | AWRI<br>1776       | AWRI<br>1833       | AWRI<br>2260      | AWRI<br>2878        | AWRI<br>2914       | P<br>values | F<br>values |
|------------------------------------------------------------------------|------------------|--------------------|--------------------|--------------------|-------------------|---------------------|--------------------|-------------|-------------|
| <b>Monoterpenoids/norisoprenoids (<math>\mu\text{g L}^{-1}</math>)</b> |                  |                    |                    |                    |                   |                     |                    |             |             |
| Linalool                                                               | linool           | $14 \pm 0.1^a$     | $10 \pm 0.3^d$     | $13 \pm 0.2^{bc}$  | $12 \pm 0.5^c$    | $13 \pm 0.8^{bc}$   | $13 \pm 0.3^b$     | < 0.001     | 27.5        |
| Nerol                                                                  | nerol            | $5.2 \pm 0.8^{ab}$ | $6.7 \pm 0.3^a$    | $3.9 \pm 0.8^{bc}$ | $1.3 \pm 1.1^d$   | $2.2 \pm 0.2^{cd}$  | $0.9 \pm 0.3^d$    | <0.001      | 33.1        |
| Geraniol                                                               | gerol            | $11.6 \pm 1.8^a$   | $7.8 \pm 0.5^b$    | $6.8 \pm 0.4^{bc}$ | $4.6 \pm 0.8^c$   | $5.7 \pm 0.6^{bc}$  | $6.0 \pm 0.2^{bc}$ | <0.001      | 23.7        |
| $\beta$ -Damascenone                                                   | BDM              | $2.8 \pm 1.1^a$    | $1.7 \pm 0.3^{ab}$ | $2.2 \pm 0.1^{ab}$ | $1.4 \pm 0.1^b$   | $1.5 \pm 0.2^{ab}$  | $1.9 \pm 0.1^{ab}$ | 0.043       | 3.3         |
| <b>VSCs (<math>\mu\text{g L}^{-1}</math>)</b>                          |                  |                    |                    |                    |                   |                     |                    |             |             |
| H <sub>2</sub> S                                                       | H <sub>2</sub> S | $1.8 \pm 1.6$      | $0.8 \pm 0.3$      | $0.4 \pm 0.2$      | $0.4 \pm 0.2$     | $0.4 \pm 0.2$       | $0.3 \pm 0.1$      | 0.12        | 2.2         |
| MeSH                                                                   | MeSH             | $1.1 \pm 0.2^b$    | $2.8 \pm 0.5^a$    | $1.3 \pm 0.2^b$    | $1.4 \pm 0.1^b$   | $1.4 \pm 0.1^b$     | $1.1 \pm 0.1^b$    | < 0.001     | 19.9        |
| DMS                                                                    | DMS              | $11.5 \pm 0.4^a$   | $7.3 \pm 0.7^{bc}$ | $8.5 \pm 0.1^b$    | $6.9 \pm 0.4^c$   | $8.0 \pm 0.9^{bc}$  | $7.8 \pm 0.2^{bc}$ | <0.001      | 28.7        |
| MeSAc                                                                  | MeSAc            | $0^b$              | $9.8 \pm 2.4^a$    | $0^b$              | $1.9 \pm 2.0^b$   | $0^b$               | $3.2 \pm 0.9^b$    | <0.001      | 25.0        |
| 3-MH                                                                   | 3MH              | $257 \pm 75^d$     | $459 \pm 70^b$     | $405 \pm 97^{bc}$  | $332 \pm 47^{cd}$ | $508 \pm 8^b$       | $662 \pm 54^a$     | <0.001      | 26.3        |
| 3-MHA                                                                  | 3MHA             | $8.5 \pm 7.4^{bc}$ | $0^c$              | $0^c$              | $0^c$             | $15.5 \pm 1.4^{ab}$ | $18.9 \pm 1.6^a$   | <0.001      | 26.5        |

Means with the same superscript letter are not significantly different from each other (Tukey's test,  $P < 0.05$ ).

**Table S9.** Probability values<sup>†</sup>, degrees of freedom (df) and mean square error (MSE) from the analysis of variance.

| Attribute                     | Strain  | FRep<br>(Strain) | J*Strain | J*FRep<br>(Strain) | Prep (Strain,<br>FRep) | MSE   |
|-------------------------------|---------|------------------|----------|--------------------|------------------------|-------|
| Red colour intensity          | 7.97*** | 4.33***          | 1.85**   | 0.83               | 1.66‡                  | 0.514 |
| Brown tinge                   | 33.1*** | 2.14*            | 2.55***  | 1.29‡              | 1.17                   | 0.416 |
| Overall fruit A               | 1.51    | 1.89*            | 1.87**   | 1.08               | 1.69*                  | 0.671 |
| Red fruit A                   | 3.92*** | 2.63**           | 1.50*    | 0.94               | 1.08                   | 1.117 |
| Dark fruit A                  | 0.37    | 0.9              | 1.61*    | 1.01               | 0.77                   | 0.840 |
| Cherry/Confectionary A        | 4.03*** | 0.68             | 1.06     | 0.97               | 1.42                   | 1.546 |
| Floral A                      | 1.67    | 0.97             | 2.73***  | 1.12               | 1.05                   | 1.604 |
| Stewed apple/Port-like A      | 1.45    | 1.54             | 1.89**   | 0.83               | 0.78                   | 1.249 |
| Tinned vegetable A            | 5.35*** | 2.00*            | 1.19     | 1                  | 0.77                   | 1.269 |
| Earthy A                      | 2.22‡   | 0.6              | 1.15     | 1.16               | 0.7                    | 0.985 |
| Stalky A                      | 0.61    | 1.11             | 1.57*    | 0.91               | 1.05                   | 0.966 |
| Flint A                       | 1.58    | 0.97             | 1.24     | 0.84               | 1.11                   | 0.971 |
| Drain A                       | 2.46*   | 2.97***          | 2.54***  | 0.63               | 0.78                   | 1.382 |
| Pungent A                     | 2.10‡   | 1.09             | 0.6      | 0.91               | 0.61                   | 1.086 |
| Nail Polish Remover/Vinegar A | 1.45    | 1.89*            | 1.3      | 1.05               | 1.47                   | 2.167 |
| Overall fruit F               | 0.95    | 1.63‡            | 1.07     | 1.13               | 1.28                   | 0.626 |
| Dark fruit F                  | 1.91    | 1.3              | 0.79     | 0.87               | 1.63‡                  | 0.779 |
| Red fruit F                   | 2.17‡   | 1.22             | 1.16     | 0.94               | 0.68                   | 1.283 |
| Cherry/Confectionary F        | 1.89    | 1.07             | 1.17     | 0.99               | 2.27**                 | 1.121 |



| Attribute                      | Strain | FRep<br>(Strain) | J*Strain | J*FRep<br>(Strain) | Prep (Strain,<br>FRep) | MSE   |
|--------------------------------|--------|------------------|----------|--------------------|------------------------|-------|
| Stewed apple/Port-like F       | 3.45** | 0.64             | 2.00***  | 0.94               | 1.19                   | 0.981 |
| Viscosity                      | 0.44   | 2.19*            | 1.09     | 0.84               | 1.39                   | 0.717 |
| Acidity                        | 1.8    | 1.73‡            | 0.93     | 0.64               | 0.61                   | 1.275 |
| Astringency                    | 1.96   | 2.31*            | 0.78     | 0.76               | 1.19                   | 1.023 |
| Hotness                        | 1.82   | 1.63‡            | 1.54*    | 0.68               | 0.90                   | 1.148 |
| Bitterness                     | 1.30   | 0.95             | 1.14     | 0.54               | 0.50                   | 1.333 |
| Fruity AT                      | 1.51   | 1.98*            | 1.60*    | 0.61               | 1.09                   | 0.984 |
| Nail Polish Remover/Vinegar AT | 1.67   | 0.82             | 1.57*    | 0.83               | 1.42                   | 1.878 |
| df                             | 5      | 12               | 50       | 120                | 18                     | 180   |

A: aroma, F: Flavour, AT: After Taste. <sup>†</sup>Significance levels are as follows: \*  $P \leq 0.05$ ; \*\*  $P \leq 0.01$ ; \*\*\*  $P \leq 0.005$ ; ‡  $P \leq 0.10$ . df = degrees of freedom. Judge effect was significant for all attributes ( $P < 0.05$ ), FRep = Fermentation replicate, PRep = presentation replicate, J = Judge.
